# Supplementary material
Source: HighWire-hosted journal article supplement (doi:10.1101/rna.034066.112)
Supplement: SuppLegends.docx [file SuppLegends.docx]

**Supplementary Figure Legends**

Supplementary Figure 1. **miRNA regulation of luciferase/nAChR subunit 3´-UTR expression.** The 3´-UTRs of nAChR subunits were cloned into a luciferase reporter vector, pmiR-REPORT and co-transfected with a miRNA precursor mimic library and pmiR-REPORT--gal (for normalization) in HEK293T cells. Due to difficulty in amplifying the entire β2 3´-UTR as a single fragment, the 3´-UTR was amplified as two overlapping fragments, which were used to generate two separate luciferase/β2 3´-UTR constructs (2.1 and 2.2). The library contains mimics corresponding to every miRNA cataloged in Sanger miRbase 9.2 (http://microrna.sanger.ac.uk/sequences/). Each circle represents the normalized luciferase activity assayed from cells transfected with a given miRNA precursor mimic (n=3). Cells transfected with a negative control miRNA precursor mimic were set to 1.0. Red dots indicate miRNAs that were significantly unregulated or down regulated by ≥ 30% with a p-value < 0.05 compared to a negative control. Student t-test was used for the statistical analysis.

Supplementary Figure 2. **Regulation of miRNA expression by chronic nicotine.** RNA was isolated from whole brains of mice chronically treated, via osmotic minipumps, with nicotine (24 mg/kg/day for 20-24 days) or saline (n=3 for saline, n=4 for nicotine). qRT-PCR TaqMan miRNA assays were used to amplify each of the miRNAs shown in Supplementary Table 1. Expression values are relative to sno202, a small nucleolar RNA not regulated by nicotine. Samples were analyzed in triplicate. Data are presented as mean ± SEM. *p<0.05, **p<0.01, ***p<0.001 compared to a saline control, student *t*-test.

|  | **2** | **3** | **4** | **5** | **6** | **7** | **9** | **10** | **2** | **3** | **4** |
| --- | --- | --- | --- | --- | --- | --- | --- | --- | --- | --- | --- |
| **miR-127** |  | **☐☐** | **☐** |  | **☐☐☐** |  |  | **☐** | **☐**x4 | **☐☐** | **☐** |
| **miR-137** |  |  |  | **☐** | **✓** |  |  |  | **☐☐** | **☐**x4 |  |
| **miR-200b** |  |  | **☐** | **✓** | **🗹** |  |  |  | **✓** |  | **** |
| **miR-200c** |  |  | **☐☐** |  | **☐** |  |  |  | **✓** |  | **☐** |
| **miR-201** | **☐** | **☐** | **☐** | **☐** | **☐** |  |  |  | **☐☐** | **☐** | **🗹☐** |
| **miR-203** |  | **🗹☐☐** |  | **☐** |  | **☐** |  |  |  | **☐** |  |
| **miR-208** |  |  |  |  | **⌧** |  |  |  |  |  |  |
| **miR-24** | **☐** |  | **☐**x4 |  | **☐** |  |  | **☐☐☐** | **☐**x7 | **☐** | **☐☐** |
| **miR-297a** |  | **✓** |  | **☐** | **☐** |  |  |  | **☐** | **⌧** | **☐** |
| **miR-297b** |  |  |  | **☐** |  |  |  |  |  |  |  |
| **miR-346** |  | **☐** | **☐☐☐** | **⌧☐☐** | **☐** |  | **☐** | **⌧** | **☐** | **☐☐** | **☐** |
| **miR-363** |  |  |  | **☐** |  | **✓** |  |  |  |  |  |
| **miR-374-3p** |  |  |  |  |  |  |  |  |  | **⌧** |  |
| **miR-422b** |  |  |  | **☐** |  |  |  |  |  |  | **✓** |
| **miR-450** |  |  |  |  |  | **☐** |  |  |  |  |  |
| **miR-490-3p** |  | **☐☐** | **☐☐☐** |  |  |  | **☐** | **☐⌧** |  | **☐☐** | **☐** |
| **miR-491** | **☐☐☐** | **☐☐☐** | **☐☐☐** | **⌧** | **☐☐☐** |  |  | **☐☐** | **☐**x5 | **☐**x7 | **☐☐** |
| **miR-494** | **☐** |  | **☐⌧** |  | **☐☐** |  |  |  |  | **☐☐** |  |
| **miR-542-3p** | **☐** |  | **☐** |  |  |  |  |  | **⌧** | **☐☐** |  |
| **miR-667** |  |  | **⌧** |  |  |  |  |  | **☐☐** |  |  |
| **miR-668** | **☐** |  | **☐☐** | **☐☐☐** | **☐** | **☐☐** |  | **☐** | **☐**x5 | **☐☐☐⌧** | **☐** |
| **miR-669b** |  |  | **☐**x9 | **☐** | **☐**x4 |  | **✓** | **☐☐** | **☐**x8 | **☐☐** | **☐**x4 |
| **miR-688** | **⌧** | **☐** |  |  |  | **☐** |  |  |  | **☐☐☐** | **✓** |
| **miR-698** |  |  | **☐☐** |  | **☐** | **⌧** |  |  | **☐** |  | **☐** |
| **miR-7a** | **☐** |  | **☐**x4 |  | **⌧⌧** |  |  |  | **☐**x6 | 🗹☐☐☐**☐** | **☐☐☐** |
| **miR-704** |  | **☐** | **☐☐** |  |  |  |  |  | **☐☐☐** | **☐☐⌧** | **☐☐** |
| **miR-741** | **☐** | **☐** | **☐** |  | **** |  |  |  | **☐☐☐** |  | **☐☐** |

**☐=** The indicated nAChR subunit 3´-UTR contains a potential MRE(s) for the indicated miRNA. **✓=** The indicated nAChR subunit 3´-UTR is regulated by the indicated miRNA. 🗹**=** The indicated nAChR subunit 3´-UTR contains a potential MRE(s) for and is regulated by the indicated miRNA. **⌧=** Regulation of indicated nAChR subunit 3´-UTR by the indicated miRNA is no longer observed upon mutation of the MRE(s).

**Supplementary Table 1.** miRNA Regulation of the Mammalian Neuronal nAChR Gene Family 3´-UTRs

**Supplementary Table 2.** Potential MREs in Genes Encoding Components of Cholinergic Signaling Pathways

| **Mouse**  **miR-494** | **Human**  **miR-494** | **Mouse**  **miR-667** | **Human**  **miR-766** | **Mouse**  **miR-542-3p** | **Human**  **miR-542-3p** |
| --- | --- | --- | --- | --- | --- |
| Chrna6 (2)  Chrna4 (2)  Slc5a7 (2)  Bche (1)  Chrna2 (1) | BCHE (1)  LIF (1)  SLC5A7 (2)  CHRNA3 (1)  CHRNA7 (1)  CHRNA4 (1) | Chrna4 (1)  Chka (1)  Chrm1 (3)  Chrm4 (1) | SLC5A7 (2)  CHRNA5 (1)  COLQ (2)  CHKA (1)  CHRNG (1)  CHRNE (1)  LYNX1 (3)  CHRNA4 (1) | Chka (1)  Chrnb2 (1)  Bche (1)  Ric3 (1)  Chrnb1 (1)  Chrm1 (1)  Chrna4 (1)  Chrnb3 (1) | RIC3 (1)  SLC5A7 (1)  LYNX1 (1)  CHRNB2 (1) |

The number of potential MREs is indicated in parentheses.
